# Supplementary material
Source: MDPI journal article supplement (https://www.mdpi.com/2311-7524/9/2/146)
Supplement: s1 [file s1]

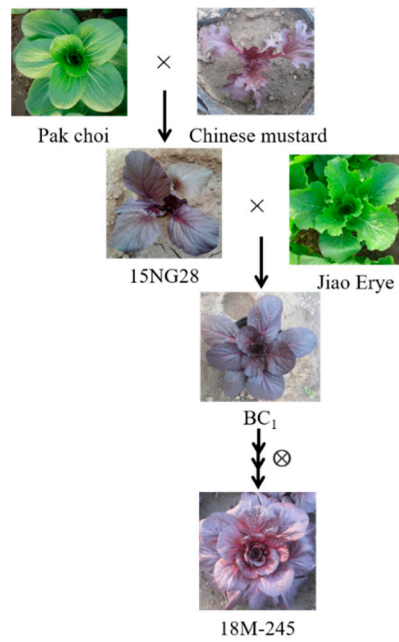

**Figure S1 Generation of new purple Chinese cabbage 18M-245.** F1 hybrid 15NG28 was obtained by crossing pak choi with Chinese mustard. Then 15NG28 was crossed with green Chinese cabbage Jiao Erye. 18M-245 was obtained by self-crossed purple plants from BC1 twice.

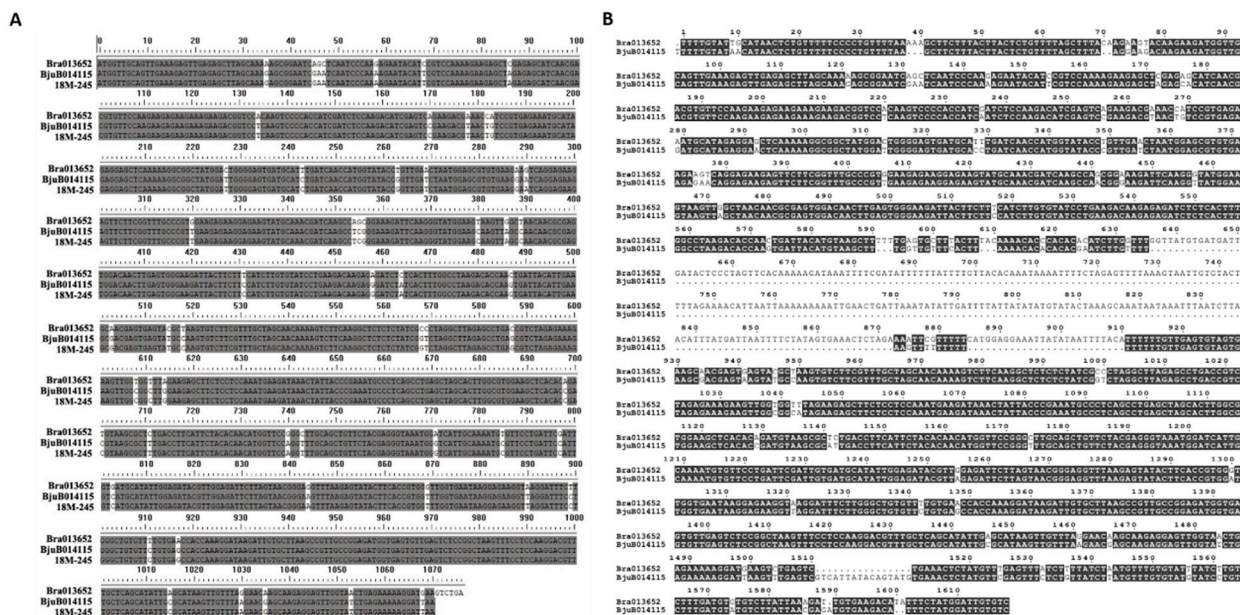

**Figure S2 The nuclear acid sequence alignment of Bra013652 and BjuB014115. A.** Coding sequences of Bra013652 and BjuB014115 share 94.06% similarity. **B.** Genomic sequence alignment of Bra013652 and BjuB014115. Bra013652 has a longer intron than BjuB014115.

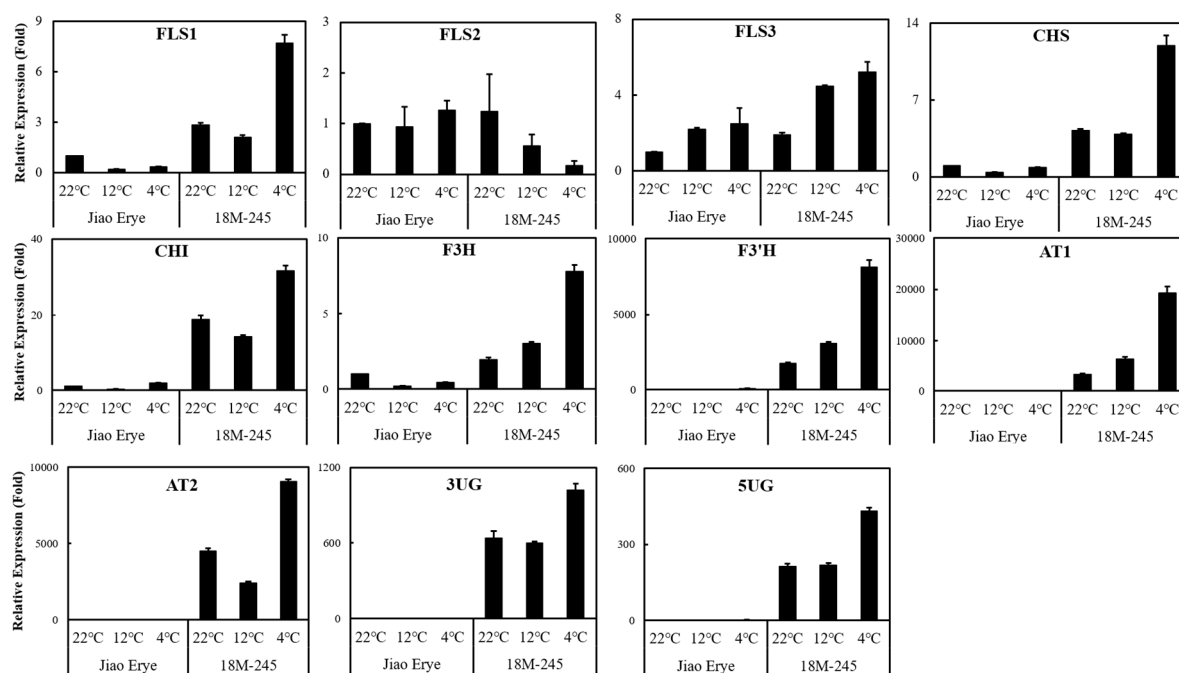

**Figure S3 Expression pattern of structural genes under three different temperatures.** Expression of anthocyanin-related structural genes under different temperatures was analyzed using RT-qPCR. GADPH was used as internal control.

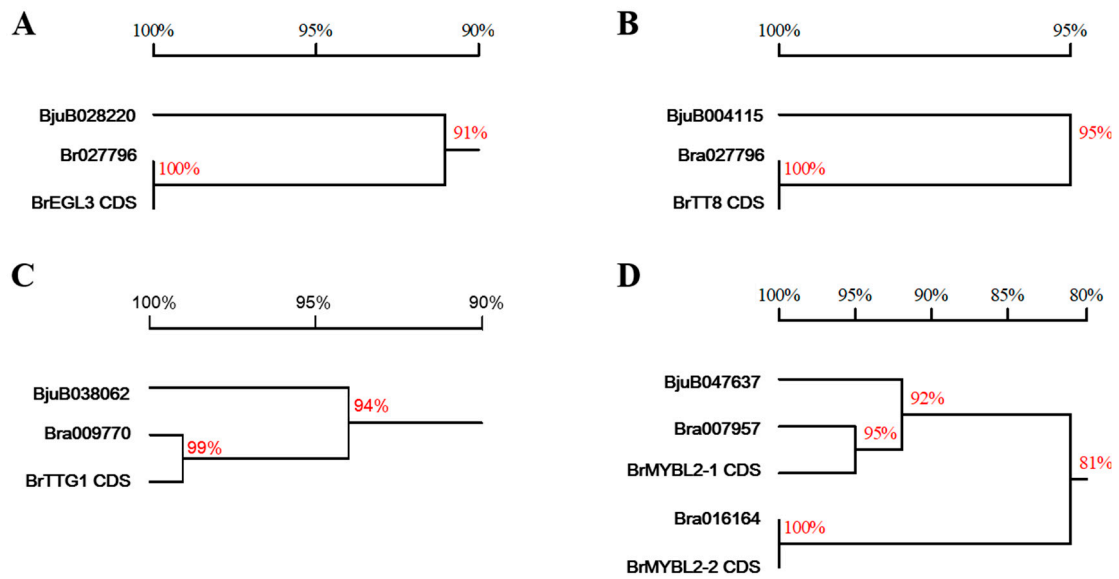

**Figure S4 Homology tree showing the similarity of TFs CDS cloned from 18M-245 with the homologous genes from *Brassica* A and B genome. The tree was generated using DNAMAN software.**

**Table S1 Primers used in this study.**

| Name                            | Sequence (5' to 3')                |
|---------------------------------|------------------------------------|
| Primers for genotyping          |                                    |
| LDOX-F                          | TTTTTGTATAACATAACTCTGTTTTTCCCC     |
| LDOX-R                          | GACACAATCCATAGAAATGTCTTCAC         |
| Primers for Q-PCR               |                                    |
| BrLDOX RT-F                     | GAGTGGGAAGATTACTTCTTCCATC          |
| BrLDOX RT-R                     | GCCTAGACCGATAGAGAGAGCCTTGAAGAC     |
| BrDFR RT-F                      | GGAAAGCCGATTTATCTGACGAAGGAAG       |
| BrDFR RT-R                      | CTTTCATTATCCCCAACACTCCATTCACTG     |
| GADPH-F                         | GGTTCCTGATGACGATGACGTCTCC          |
| GADPH-R                         | GTTGTGACATGAGAAGTGTTGATACTGTC      |
| Primers for vector construction |                                    |
| BjuB014115promoter-F            | CTTAGTCCGTTGGTCATGTATGTTTCATCG     |
| BjuB014115promoter-R            | CTTCTTGTCTTCCTTAAAGCTAAAAC         |
| EGL3 AD NdeI-F                  | TACGCTCATATGGCTACTGGAGAAAACAG      |
| EGL3 AD EcoRII-R                | ACCCGGGTGGAATTCACATATCCATGCAACTC   |
| TT8 AD NdeI-F                   | TACGCTCATATGGATGAATTAAGTATTATACCG  |
| TT8 AD EcoRI-R                  | ACCCGGGTGGAATTCGAGTTTATTATTATATATG |
| TTG1 AD NdeI-F                  | TACGCTCATATGATGGACAACCTCAGCTCCGG   |
| TTG1 AD EcoRI-R                 | ACCCGGGTGGAATTCAACTCTAAGGAGCTGC    |
| MYBL2-1 AD NdeI-F               | TACGCTCATATGAACATAGTCTGTGTCCGC     |
| MYBL2-1 AD EcoRII-R             | ACCCGGGTGGAATTCTTGACGCGTTGAACC     |
| MYBL2-2 AD NdeI-F               | TACGCTCATATGAACAAAATTAGCCACGGCG    |
| MYBL2-2 AD EcoRII-R             | ACCCGGGTGGAATTCCTGAAAAAGAAGAAG     |
| F3'H RT-F                       | GCACACGGACATGCTTAGCACTTTAATC       |
| F3'H RT-R                       | GCCCAGTCCACCGTACTTGCTGACG          |
| CHI RT-F                        | CCCACCGTCACGAACTTCAAGTTGATTC       |
| CHI RT-R                        | GGTAAACTCCGATGACGGTGAAGATC         |
| AT1 RT-F                        | GGCTCATCTTCAATCTCTTAACATCATCG      |
| AT1 RT-R                        | GATAGTCTTTGAGGAAATGTTCCGGTTGAG     |
| AT2 RT-F                        | GTGCAGTCCAGCCCAACGGTTAACATAC       |
| AT2 RT-R                        | GGACAGAGCGAGATAACTCGGGGAC          |
| CHS RT-F                        | CGTTGGATGAGATCAGAAAGGCAC           |
| CHS RT-R                        | CTGTTGGTGATGCGGAAGTAGTAGTC         |
| F3H RT-F                        | CGCTCGAGACTTCTTCGCCTTACCTC         |
| F3H RT-R                        | GTCACCTTCACCCATCCTTCCGGCTTAG       |
| 3GT RT-F                        | ATGGGCGATTTTGGATCCGATGGATCGTC      |
| 3GT RT-R                        | GTAGAGGTTAAGAGGTTTGACCTGGTCTAG     |
| 5GT RT-F                        | ATGGCCAACCTCGGTTAACGGTTGTAGTC      |
| 5GT RT-R                        | GAACCAAGCGTAGGACAAGCCTTCGG         |
| FLS1 RT-F                       | GTCTCGCTCGAGACTTCTTCGCCTTAC        |
| FLS1 RT-R                       | CATCCTTCGGCTTAGTCGGCCACC           |
| FLS2 RT-F                       | ATGGAAGTCAAGAAAGACCAGCACACATC      |

FLS2 RT-R

GAAGAACTGTGTACCAACCTCCTTCAACC

FLS3 RT-F

GAAAAACATGGGCTGATCATCTCTTTCACAG

FLS3 RT-R

GTAACCCTAGTCCTTCCGATAACCATC

---
